# Supplementary material
Source: publisher figshare collection journal article supplement (https://wellcome.figshare.com/ndownloader/files/9821917)
Supplement: Supplementary file 1 [file 9821917]

**Wellcome Open Research publication data (November 2016 - November 17): an explanation of the data**

## Overview

On November 15th 2017 we celebrated Wellcome Open Research first year of publishing (see more in the blog here: <https://blog.wellcomeopenresearch.org/2017/11/16/wellcome-open-research-first-year-in-numbers/>).

As part of this annual milestone we created an infographic that highlighted some of the key numbers that represent our achievements to-date with regards to our authors, articles, publishing process and peer review.

This first dataset *only* includes information around the publishing process. It does not include the individual article data for authors or for the software and data repositories. This will be added in due course.

**The dataset**

The dataset contains the following elements:

### Article URL

Wellcome Open Research authors can upload new versions of their articles, either to address comments made in referee reports, or to update the paper for other reasons. Versions are linked and are individually citable, and older versions will display a clear notification that a new version has been uploaded. Each article version has a specific URL, if there are more than one version then new versions are listed separately and differentiated with a v2, v3 etc.

### Volume

This number lists which volume of Wellcome Open Research the article was published in. Volume 1 is any article published in 2016. Volume 2 is any article published in 2017.

### Publication Number

Denotes the number of the article published in a volume of Wellcome Open Research. For example, 1-32 is the 32nd article published in Volume 1.

### Article Type

Denotes what type of article has been published. The article types published by Wellcome Open Research are: Research Article, Method Article, Study Protocols, Systematic Reviews, Software Tool Article, Clinical Practice Articles, Research Notes, Data Notes, Case Reports, Open Letters and Correspondences.

### Version Number

This number identifies the version of an article.

### Submission Date

This date identifies when the version of an article was submitted to Wellcome Open Research.

Prepub Checks With Authors

This date identifies when the Wellcome Open Research editorial team have completed their prepublication checks, accepted the article (<https://wellcomeopenresearch.org/about>) and sent the article back the authors.

*Note: this is a field that is manually entered into the editorial management system by the editorial team and sometimes it has not been recorded.*

Author Revisions Received

This date identifies when the authors have addressed (if any) the things needed to pass the editorial prepublication check and sent it back to the editorial team.

*Note: this is a field that is manually entered into the editorial management system by the editorial team and sometimes it has not been recorded.*

Sent to Typesetters

This date identifies when the Wellcome Open Research editorial team has sent the article to the typesetters.

*Note: this is a field that is manually entered into the editorial management system by the editorial team and sometimes it has not been recorded.*

PDF Proofs To Authors

This date identifies when the Wellcome Open Research editorial team has sent the PDF proofs to the authors for a final check.

*Note: this is a field that is manually entered into the editorial management system by the editorial team and sometimes it has not been recorded.*

Published

This date identifies when the Wellcome Open Research editorial team has published the article on Wellcome Open Research.

Referee Report 1

This date identifies when the first referee report for the article was published on Wellcome Open Research.

Referee Report 2

This date identifies when the second referee report for the article was published on Wellcome Open Research.

Referee Report 3

This date identifies when the third referee report for the article was published on Wellcome Open Research.

Referee Report 4

This date identifies when the fourth referee report for the article was published on Wellcome Open Research.

Indexed

This date identifies when the article has passed peer review (<https://wellcomeopenresearch.org/about>) and has been sent to indexers such as PubMed.

Referee Status

This field describes the different referee statuses an article has received;

A = Approved, AR = Approved with Reservations, NA = Not approved.

*Note: In ordered to be indexed an article must receive 2 approved statuses, or 2 approved with reservations and 1 approved statuses.*

## Comment

Data on the infographic: <https://blog.wellcomeopenresearch.org/2017/11/16/wellcome-open-research-first-year-in-numbers/>.

- We state the average time from submission to publication is 28 days. This is determined by calculating the time difference between “Submission date” and “Published”.
- We state the average time from submission to being indexed in PubMed as 72 days. This is determined by calculating the time difference from “Submission date” and “Indexed”.
- We state the median time to first review is 14 days. This is determined by calculating the time difference from “Published” and “Referee Report 1”.
- We state the median time to first review is 14 days. This is determined by calculating the time difference from “Published” and “Referee Report 2”.
- We state the median time to being indexed in PubMed is 33 days. This is determined by calculating the time difference from “Published” and “Indexed” and selecting the median value.
